# Supplementary material for: Sign of APOBEC editing, purifying selection, frameshift, and in-frame nonsense mutations in the microevolution of lumpy skin disease virus
Source: Front Microbiol. 2023 Nov 14;14:1214414. doi: 10.3389/fmicb.2023.1214414 (PMC10682384; doi:10.3389/fmicb.2023.1214414)
Supplement: Supplementary file 14 [file Table_4.XLS]

## Sheet: Nucleotide Composition
Domain: Data
	T(U)	C	A	G	Total		AT	GC		A	T	G	C
NC 003027.1 LSDV NI-2490	36.4495	12.7218	37.638	13.1907	150773		74.0875	25.9125		56748	54956	19888	19181
MN072619.1 LSDV Kenya	36.4534	12.7141	37.6468	13.1857	150329		74.1001	25.8999		56594	54800	19822	19113
KX683219.1 LSDV KSGP 0240	36.4307	12.7131	37.6679	13.1883	150656		74.0986	25.9014		56749	54885	19869	19153
MW631933.1 LSDV LSD	36.4871	12.658	37.7096	13.1453	146090		74.1967	25.8033		55090	53304	19204	18492
AF325528.1 LSDV NI-2490 isolate Neethling 2490	36.4495	12.7218	37.638	13.1907	150773		74.0875	25.9125		56748	54956	19888	19181
OK422492.1 LSDV/Cattle/India/2019/Ranchi-1/P10	36.4767	12.6627	37.717	13.1436	146170		74.1937	25.8063		55131	53318	19212	18509
OK422493.1 LSDV/Cattle/India/2019/Ranchi-1/P30	36.4374	12.6998	37.706	13.1568	147483		74.1435	25.8565		55610	53739	19404	18730
OK422494.1 LSDV/Cattle/India/2019/Ranchi-1/P50	36.5346	12.8478	37.494	13.1236	138841		74.0286	25.9714		52057	50725	18221	17838
ON400507.1 LSDV 208/PVNRTVU/2020	36.4874	12.7203	37.6589	13.1333	148188		74.1464	25.8536		55806	54070	19462	18850
OK318001.1 LSDV isolate V281	36.4618	12.7209	37.6252	13.1921	150681		74.087	25.913		56694	54941	19878	19168
MT007950.1 LSDV Namibia 2016 9F	36.439	12.7202	37.6494	13.1914	150454		74.0884	25.9116		56645	54824	19847	19138
MT007951.1 LSDV Namibia 2016 10F	36.3734	12.7986	37.5816	13.2464	146500		73.9549	26.0451		55057	53287	19406	18750
AF409137.1 LSDV Neethling Warmbaths LW	36.452	12.7221	37.6337	13.1923	150793		74.0857	25.9143		56749	54967	19893	19184
MW656253.1 LSDV/280-KZN/RSA/2018	36.4619	12.7076	37.6486	13.1819	150335		74.1105	25.8895		56599	54815	19817	19104
SRR21590382	36.4554	12.7218	37.6447	13.1781	150765		74.1001	25.8999		56755	54962	19868	19180
SRR21590384	36.4558	12.7194	37.6463	13.1784	150777		74.1022	25.8978		56762	54967	19870	19178
SRR21590385	36.4554	12.7218	37.6453	13.1775	150765		74.1008	25.8992		56756	54962	19867	19180
SRR21590386	36.4534	12.7234	37.6441	13.1791	150746		74.0975	25.9025		56747	54952	19867	19180
SRR21590383	36.4554	12.7218	37.6453	13.1775	150765		74.1008	25.8992		56756	54962	19867	19180
MW699032.1 LSDV/Russia/Dagestan/2015	36.4557	12.7128	37.649	13.1824	150344		74.1047	25.8953		56603	54809	19819	19113
MH893760.2 LSDV/Russia/Dagestan/2015	36.4505	12.7229	37.638	13.1886	150736		74.0885	25.9115		56734	54944	19880	19178
MN995838.1 LSDV pendik	36.4595	12.718	37.6406	13.1818	150715		74.1001	25.8999		56730	54950	19867	19168
KX894508.1 LSDV 155920/2012	36.4534	12.7091	37.6562	13.1813	150562		74.1097	25.8903		56696	54885	19846	19135
MN642592.1 LSDV Kubash/KAZ/16	36.4614	12.7149	37.6436	13.1801	150485		74.1051	25.8949		56648	54869	19834	19134
KY702007.1 LSDV SERBIA/Bujanovac/2016	36.458	12.7173	37.6435	13.1812	150661		74.1015	25.8985		56714	54928	19859	19160
MT643825.1 LSDV 210LSD-249/BUL/16	36.4612	12.7164	37.6429	13.1795	150719		74.1041	25.8959		56735	54954	19864	19166
KY829023.3 LSDV Evros/GR/15	36.459	12.7191	37.639	13.183	150679		74.0979	25.9021		56714	54936	19864	19165
MT134042.1 LSDV/Russia/Udmurtiya/2019	36.4221	12.7117	37.6772	13.189	150436		74.0993	25.9007		56680	54792	19841	19123
OM984485.1 LSDV XJ201901	36.4212	12.7168	37.6446	13.2174	150635		74.0658	25.9342		56706	54863	19910	19156
OM984486.1 LSDV FJ2019	36.4218	12.7179	37.6443	13.2159	150591		74.0662	25.9338		56689	54848	19902	19152
MW355944.1 LSDV China/GD01/2020	36.4212	12.7183	37.6449	13.2156	150602		74.0661	25.9339		56694	54851	19903	19154
ON152411.1 LSDV72/PrachuapKhiriKhan/Thailand/2021	36.4398	12.7236	37.619	13.2176	150602		74.0588	25.9412		56655	54879	19906	19162
OM793602.1 LSDV Russia Tomsk 2020	36.4354	12.7185	37.6363	13.2098	150222		74.0717	25.9283		56538	54734	19844	19106
OM793603.1 LSDV Russia Khabarovsk 2020	36.4326	12.7196	37.6389	13.2089	150209		74.0715	25.9285		56537	54725	19841	19106
MW732649.1 LSDV/HongKong/2020	36.4341	12.7188	37.6347	13.2124	150510		74.0688	25.9312		56644	54837	19886	19143
MZ577076.1 LSDV 20L81 Bang-Thanh/VNM/20	36.4274	12.721	37.6334	13.2182	150664		74.0608	25.9392		56700	54883	19915	19166
MZ577073.1 LSDV 20L42 Quyet-Thang/VNM/20	36.4272	12.7209	37.6338	13.2181	150665		74.061	25.939		56701	54883	19915	19166
MZ577074.1 LSDV 20L43 Ly-Quoc/VNM/20	36.4226	12.7185	37.6417	13.2172	150599		74.0642	25.9358		56688	54852	19905	19154
OL752713.2 LSDV/KM/Taiwan/2020	36.4416	12.717	37.6212	13.2202	150822		74.0628	25.9372		56741	54962	19939	19180
MZ577075.1 LSDV 20L70 Dinh-To/VNM/20	36.4216	12.7171	37.6434	13.2178	150600		74.0651	25.9349		56691	54851	19906	19152
OL542833.1 LSDV/Russia/Tyumen/2019	36.4465	12.7067	37.6791	13.1677	150338		74.1256	25.8744		56646	54793	19796	19103
OM530217.1 LSDV/Russia/Saratov/2019	36.4522	12.7012	37.6358	13.2108	150309		74.088	25.912		56570	54791	19857	19091
MH646674.1 LSDV/Russia/Saratov/2017	36.4248	12.7007	37.6519	13.2226	150606		74.0767	25.9233		56706	54858	19914	19128
MW656252.1 LSDV/Haden/RSA/1954	36.4431	12.7199	37.6467	13.1903	150300		74.0898	25.9102		56583	54774	19825	19118
KX764645.1 LSDVNeethling-LSD vaccine-OBP	36.4304	12.7164	37.6583	13.1948	150506		74.0887	25.9113		56678	54830	19859	19139
MK441838.1 LSDV Herbivac LS	36.4375	12.7257	37.6428	13.1941	150507		74.0803	25.9197		56655	54841	19858	19153
AF409138.1 LSDV Neethling vaccine LW 1959	36.4377	12.7255	37.6429	13.1939	150509		74.0806	25.9194		56656	54842	19858	19153
MG972412.1 LSDV Cro2016	36.4316	12.7222	37.6534	13.1928	150438		74.085	25.915		56645	54807	19847	19139
KX764644.1 LSDV Neethling-Herbivac vaccine	36.4301	12.7178	37.6585	13.1935	150521		74.0887	25.9113		56684	54835	19859	19143
KX764643.1 LSDV SIS-Lumpyvax vaccine	36.4308	12.72	37.6568	13.1925	150480		74.0876	25.9124		56666	54821	19852	19141
MW435866.1 LSDV SA-Neethling	36.407	12.7283	37.6613	13.2035	150680		74.0682	25.9318		56748	54858	19895	19179
MN636839.1 LSD-103-GP-RSA-1991	36.4353	12.7196	37.6501	13.195	150398		74.0854	25.9146		56625	54798	19845	19130
MN636843.1 LSD-148-GP-RSA-1997	36.4351	12.7217	37.6493	13.1938	150396		74.0844	25.9156		56623	54797	19843	19133
MN636838.1 LSDVLSD-58-LP-RSA-1993	36.4358	12.7211	37.6493	13.1938	150396		74.0851	25.9149		56623	54798	19843	19132
MN636841.1 LSD-220-1-NW-RSA-1993	36.4358	12.7211	37.6493	13.1938	150396		74.0851	25.9149		56623	54798	19843	19132
MN636842.1 LSD-220-2-NW-RSA-1993	36.4358	12.7211	37.6493	13.1938	150396		74.0851	25.9149		56623	54798	19843	19132
MN636840.1 LSD-248-NW-RSA-1993	36.4358	12.7211	37.6493	13.1938	150396		74.0851	25.9149		56623	54798	19843	19132
Avg.	36.4434	12.7195	37.6456	13.1915	150027		74.089	25.911		56478.4	54674.8	19790.8	19082.6

## Sheet: Info
Data Filename:	Reverse complement final visualizer analysis name edit PVNTR ITR removed alined final arancged.meg
Data Title:
Nucleotide Frequencies
Sites Used:	All selected
All frequencies are given in percent.
